# Supplementary material
Source: Springer Nature journal article supplement (https://www.springermedizin.de/resource/supplementary/13049_2011_317_MOESM5_ESM.pdf/9666330)
Supplement: MOESM5 [file 9666330]

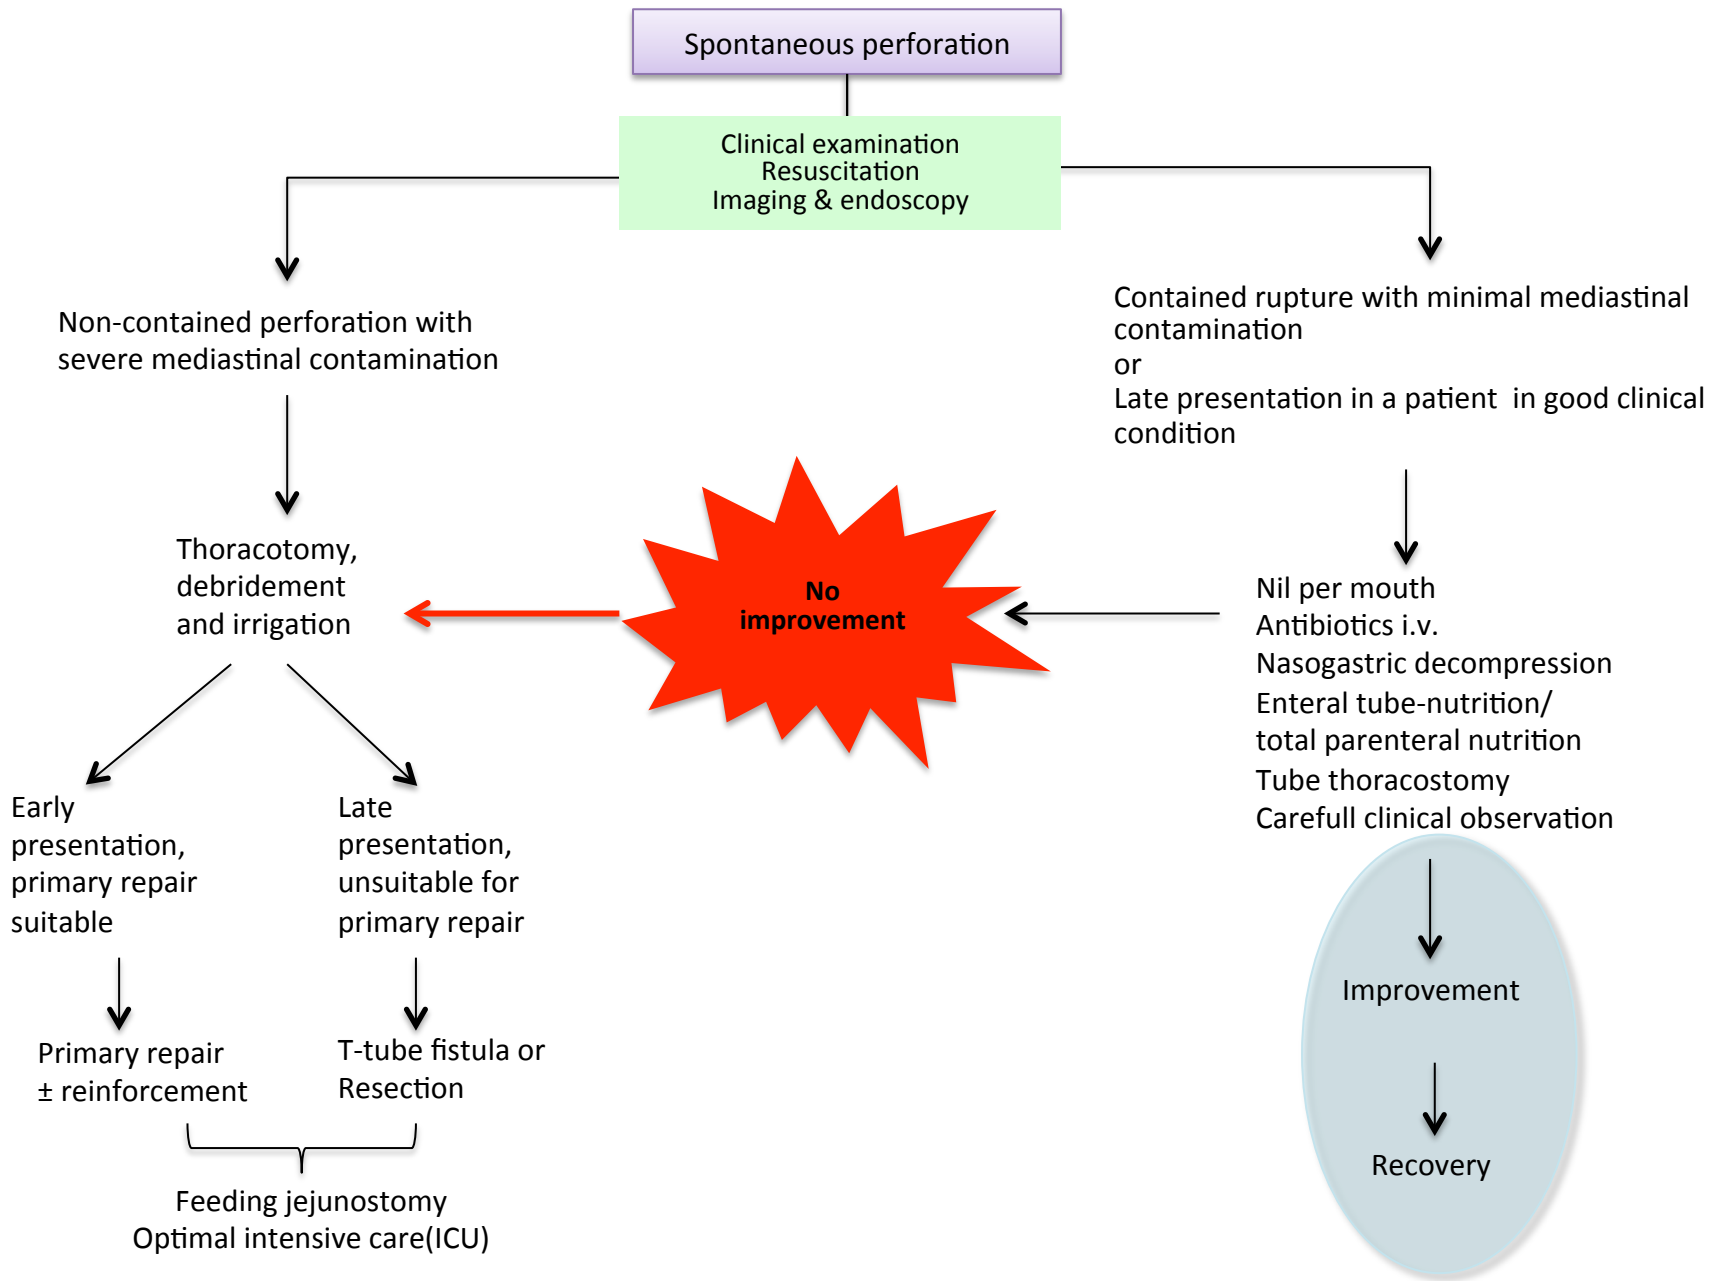

Spontaneous perforation

Clinical examination  
Resuscitation  
Imaging & endoscopy

Non-contained perforation with  
severe mediastinal contamination

Contained rupture with minimal mediastinal  
contamination  
or  
Late presentation in a patient in good clinical  
condition

Thoracotomy,  
debridement  
and irrigation

**No  
improvement**

Nil per mouth  
Antibiotics i.v.  
Nasogastric decompression  
Enteral tube-nutrition/  
total parenteral nutrition  
Tube thoracostomy  
Carefull clinical observation

Early  
presentation,  
primary repair  
suitable

Late  
presentation,  
unsuitable for  
primary repair

Primary repair  
± reinforcement

T-tube fistula or  
Resection

Feeding jejunostomy  
Optimal intensive care( ICU)

Improvement

Recovery
